# Supplementary material for: Green electrode processing using a seaweed-derived mesoporous carbon additive and binder for LiMn2O4 and LiNi1/3Mn1/3Co1/3O2 lithium ion battery electrodes
Source: Royal Society of Chemistry journal article supplement (doi:10.1039/c8se00483h), 2018-11-19
Supplement: c8se00483h1.pdf [file c8se00483h1.pdf]

## Supporting Information

### Green electrode processing using seaweed-derived mesoporous carbon additive and binder for $\text{LiMn}_2\text{O}_4$ and $\text{LiNi}_{1/3}\text{Mn}_{1/3}\text{Co}_{1/3}\text{O}_2$ lithium ion battery electrodes

Sanghoon Kim,<sup>a,\*</sup> Mario De bruyn,<sup>b</sup> Nicolas Louvain,<sup>a,c</sup> Johan G. Alauzun,<sup>a</sup> Nicolas Brun,<sup>a</sup> Duncan J. Macquarrie,<sup>b</sup> Bruno Boury,<sup>a</sup> Lorenzo Stievano,<sup>a,c</sup> P. Hubert Mutin,<sup>a</sup> and Laure Monconduit,<sup>a,c,\*</sup>

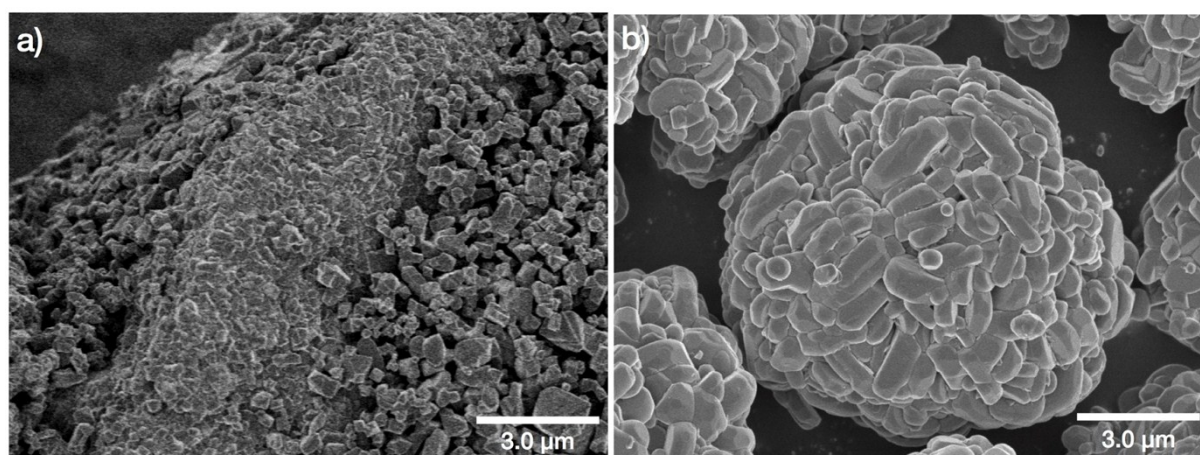

Fig. S1. SEM images of a) LMO and b) NMC

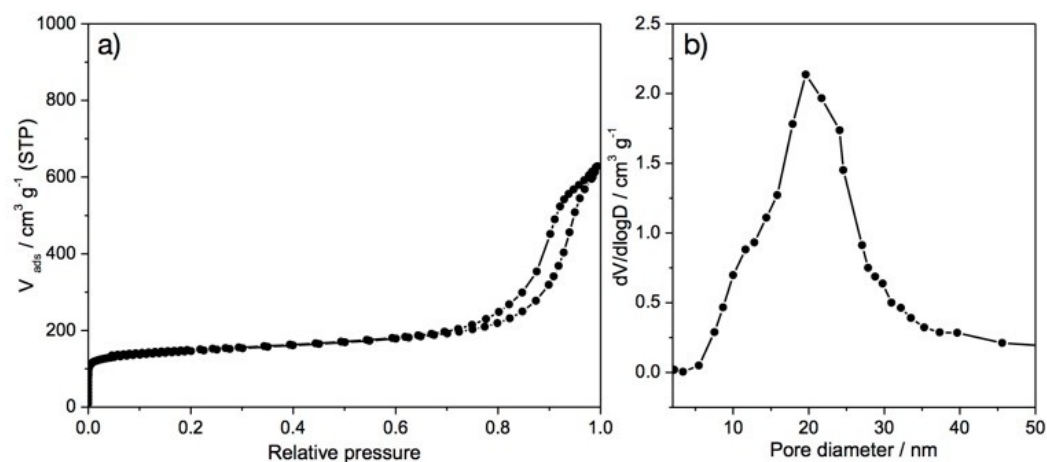

Fig. S2. a)  $\text{N}_2$  adsorption-desorption isotherm and b) BJH pore size distribution (desorption branch) of A800.

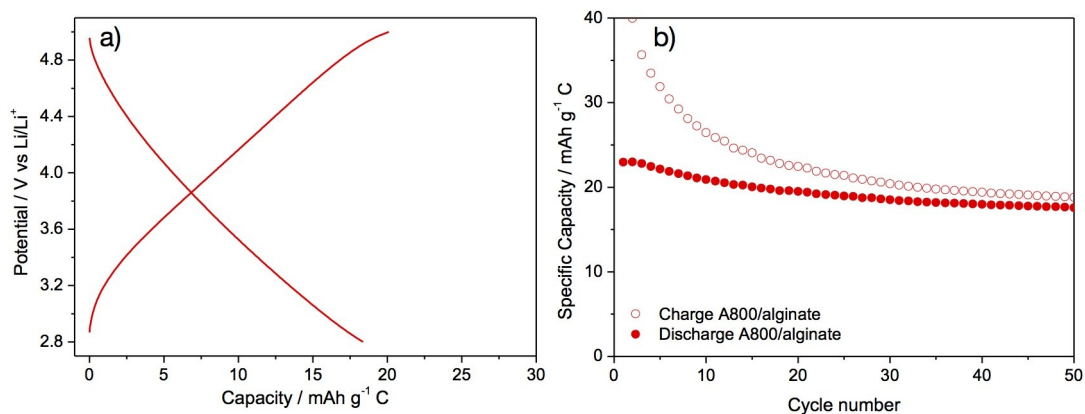

Fig.S3. a) Representative galvanostatic charge–discharge curves for A800/alginate electrode (ratio of 9:1) cycled at  $100 \text{ mA g}^{-1}$  within 2.8 – 5.0 V vs  $\text{Li/Li}^+$  and b) its long term cycling test.

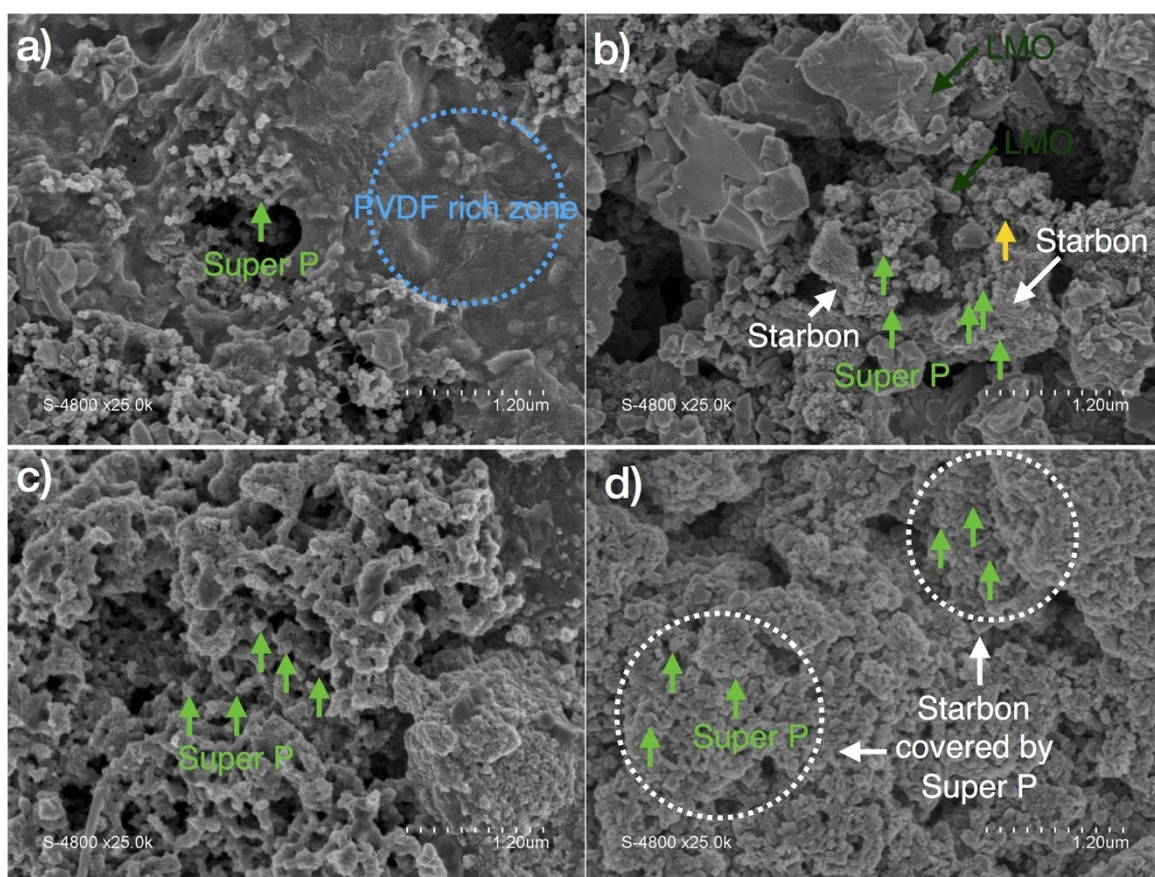

Fig. 4. SEM images of electrodes before cycling: a) LMO/Super P/PVDF, b) LMO/BC61/alginate and after 10 cycles at C/10: c) LMO/Super P/PVDF, d) LMO/BC61/alginate.

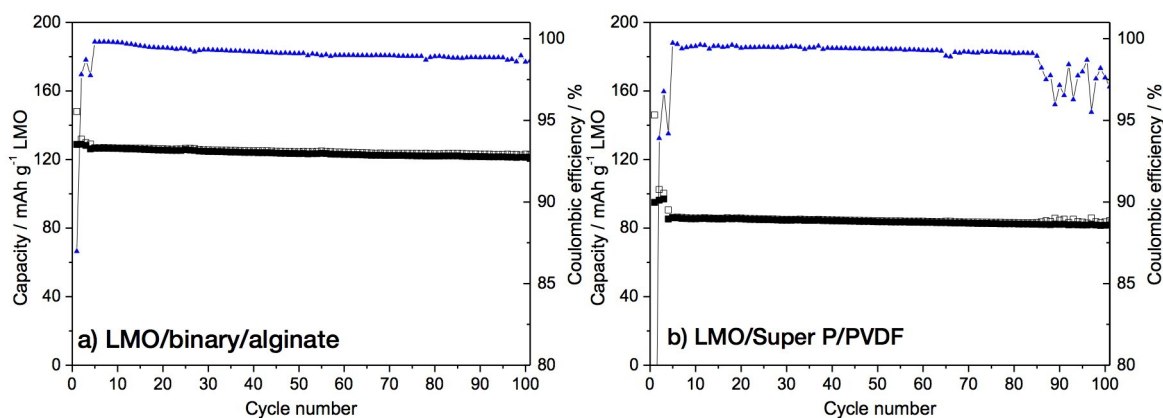

Fig. S5. Long term cycling test for a) LMO/binary carbon/alginate and b) LMO/Super P/PVDF electrodes at 1 C for 100 cycles. The first 3 cycles tested at 0.1 C.

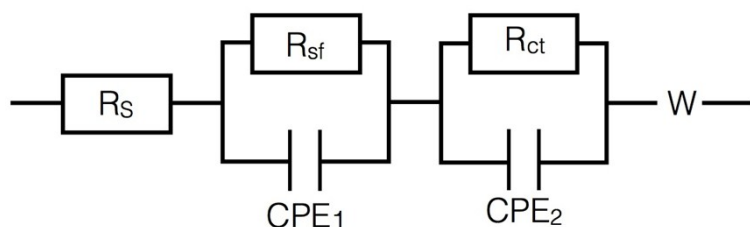

Fig. S6 Equivalent model used for EIS fitting.

|                       | LMO/BC61/alginate | LMO/Super P/PVDF |
|-----------------------|-------------------|------------------|
| $R_s$ (ohm)           | 3.52              | 3.75             |
| $R_{ct}$ (ohm)        | 20.16             | 32.7             |
| $R_{sf}$ (ohm)        | 87.03             | 178.3            |
| $w$ (ohm $s^{-1/2}$ ) | 147.7             | 214.5            |

Table S1. Impedance results.  $R_s$  stands for the ohmic resistance from the entire system such as the electrolyte, the cables, any copper wire placed between the connectors of the instrument,  $R_{cf}$  for the resistance from CEI layer,  $R_{ct}$  for the charge transfer resistance,  $w$  for Warburg impedance coefficient.
